# Supplementary material
Source: PubMed Central journal article supplement (PMC9731628)
Supplement: ASN.2022040444SupplementaryData1.pdf [file ASN.2022040444SupplementaryData1.pdf]

## Supplemental Figure Legends

**Supplemental Figure 1. HK normalization corrects block age effect on RNA recovery.** Plotted are the log<sub>2</sub> geometric means of 758 gene probes from 301 needle core kidney biopsies by age of block. The yield of RNA without housekeeping normalization shows a steady decline. Normalization using 12 housekeeping (HK) genes per the standard normalization procedure corrects this effect. (Pearson correlation coefficient,  $r$ ).

**Supplemental Figure 2. AMR pathways are not affected by tubulitis in CAMR while TCMR pathways correlate with tubulitis.** A) AMR pathway scores do not correlate with tubulitis (Banff  $t$ ) in CAMR. B) TCMR pathways correlate with tubulitis. TCMR pathway scores show a strong correlation with the extent of tubulitis whether in CAMR or non-CAMR. ( $p$  values by logistic regression).

**Supplemental Figure 3. AMR pathway scores not correlated with glomerular inflammation (Banff  $g$  scores).** A) AMR pathway scores are not correlated with glomerulitis (Banff  $g$ ) in CAMR. B) Pan-Endothelium pathway scores are not correlated with transplant glomerulopathy scores (Banff  $cg$ ). ( $p$  values by logistic regression, red; Mann-Whitney, blue).

**Supplemental Figure 4: AMR pathway scores are not correlated with endarteritis ( $v$  score) and glomerular basement membrane duplication ( $cg$  score) in CAMR.** A) AMR pathway scores are not correlated with endarteritis ( $v$  score) in TCMR or CAMR. B) TCMR pathway scores correlate with the presence of endarteritis in TCMR and Mixed rejection. ( $p$  values by logistic regression, red; Mann-Whitney, blue).

**Supplemental Figure 5: Differential Gene Expression in DSA<sup>+</sup> Positive and DSA<sup>-</sup> CAMR.** Four endothelial genes are differentially expressed. Six genes were differentially expressed in DSA<sup>+</sup> CAMR related to NK cells, endothelium and lymphocyte chemotaxis/angiogenesis. One gene was elevated in DSA neg CAMR, the hepatocyte growth factor receptor (MET) typically expressed in epithelial cells, including proximal tubular epithelium.

**Supplemental Figure 6. M2 Macrophage Subset is associated with graft failure.** Macrophage gene sets associated with M2 but not M1 macrophages are elevated in biopsies with TCMR or CAMR that fail within 3 years. Genes in the panels are indicated. M2 but not M1 macrophage scores were correlated with outcome in both TCMR and CAMR (with or without TCMR). (p values, two tailed t test).

**Supplemental Figure 7. Differential gene expression in CAMR is associated with graft failure 3 years after biopsy (indication biopsies).** Several macrophage associated genes are elevated in grafts that failed (green highlight).

**Supplemental Figure 8. Differential gene expression in TCMR is associated with graft failure 3 years after biopsy (indication biopsies).** Several macrophage associated genes are elevated in grafts that failed (green highlight).

**Supplemental Figure 9. Prediction of CAMR declines progressively with later onset.** A and B) AMR pathway scores in samples with a diagnosis of NER, BS or TCMR decrease with later onset of CAMR. (p values by logistic regression, red; Mann-Whitney, blue).

### **Supplemental Figure 10. Random Forest Outcome Classification in CAMR/Mixed.**

Representative RF classification of outcome in CAMR/Mixed cases using the top 24 variables selected from all variables combined (clinical, pathology, pathway/cell types and individual genes (n=953) (see Supplemental Figure 12 A-D). All types of variables contributed. The variables are ranked by relative importance to the correct RF classification and color-coded by type. All variables are higher in the Fail group except *KT2*, *Glomerular Endothelium*, *FCER1A*, *PDGFRB*, *IFIT1*, *CD207*, and *SLC4A1*. Seventy random samples were used to generate 2000 different trees and then classify the samples which were not used to generate each tree (the Out Of Bag samples, OOB). Details are given in the Methods section.

### **Supplemental Figure 11. Random Forest Outcome Classification in BS-TCMR.**

Representative RF classification of outcome in BS-TCMR cases using the top 33 variables selected from all variables combined (clinical, pathology, pathway/cell types and individual genes (n=953) (see Supplemental Figure 13 A-D). All types of variables contributed except the clinical/laboratory variables. The variables are ranked by relative importance to the correct RF classification and color-coded by type. All variables are higher in Fail group, except *Banff i*.

Thirty-five random samples were used to generate 2000 different trees and then classify the samples which were not used to generate each tree (the Out Of Bag samples, OOB). Details are given in the Methods section.

### **Supplemental Figure 12. Random Forest Outcome Classification in CAMR/Mixed**

**Using Each Category of Variables.** Top variables are listed from A) Clinical and

Laboratory Variables B) Pathology C) Pathway/Cell type Scores D) Individual Transcripts.

**Supplemental Figure 13. Random Forest Outcome Classification in BS-TCMR Using Each Category of Variables.** Top variables are listed from A) Clinical and Laboratory Variables B) Pathology C) Pathway/Cell Type Scores and D) Individual Transcripts.

**Supplemental Table 1.** Aggregate Banff scores and other pathology features by diagnostic category.

**Supplemental Table 2.** HOT Panel Pathway Gene Sets. Includes NanoString Advanced Analysis Pathways and cell types, published transplant gene sets (Microarray, nCounter) and custom gene sets and cell types (Colvin et al).

**Supplemental Table 3.** Random Forest % Correct Classification of 3-Year Graft Survival by Variable Type.

**Supplemental Table 4.** Univariate analysis of all variables: No CAMR vs PreCAMR within 5 years.

# Supplemental Figure 1

A

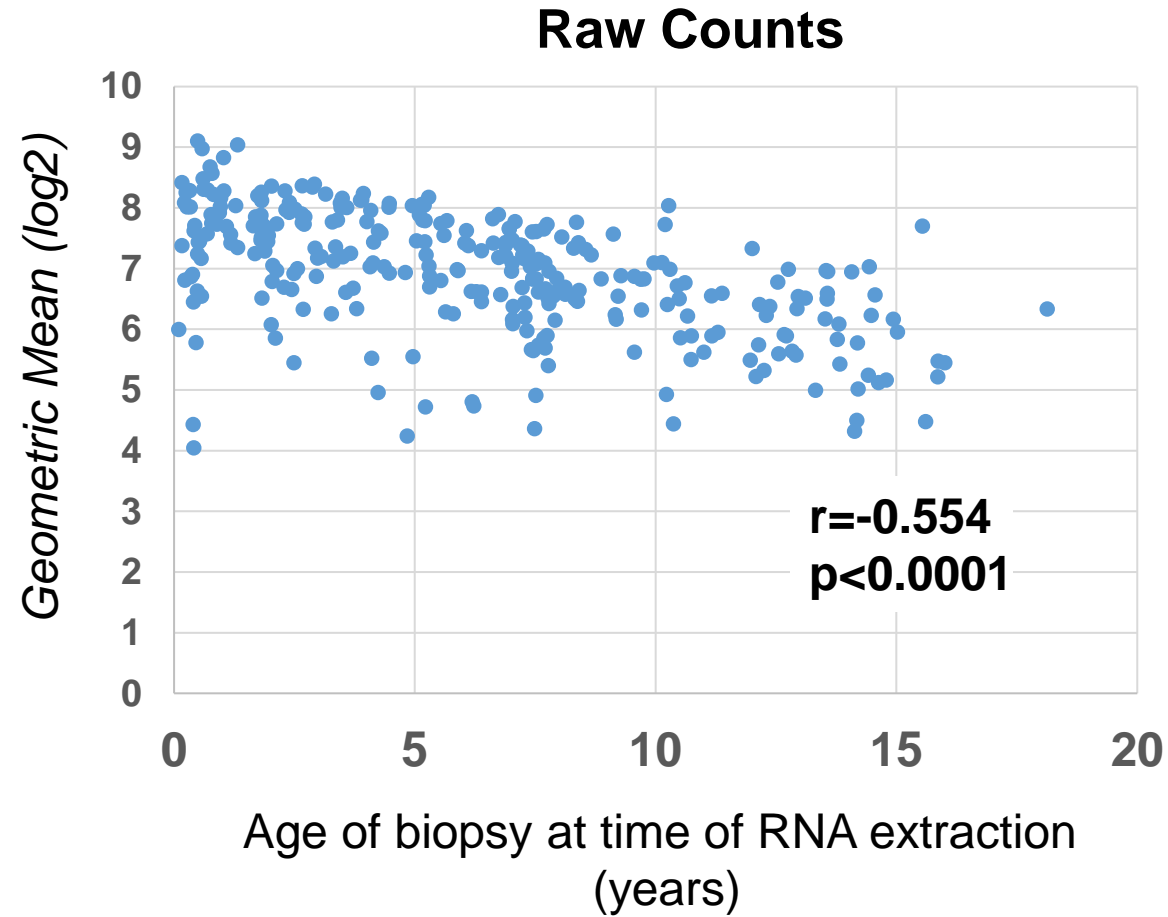

B

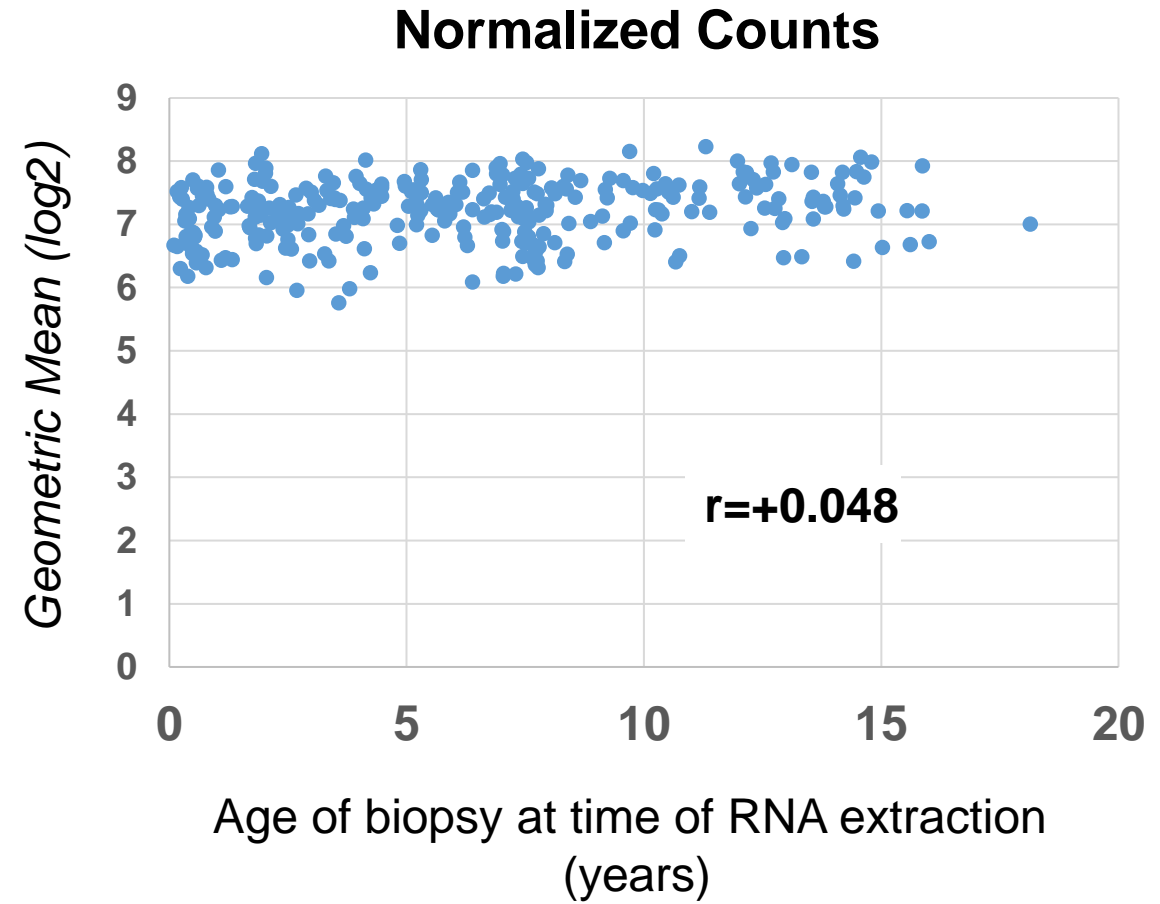

# Supplemental Figure 2

## A

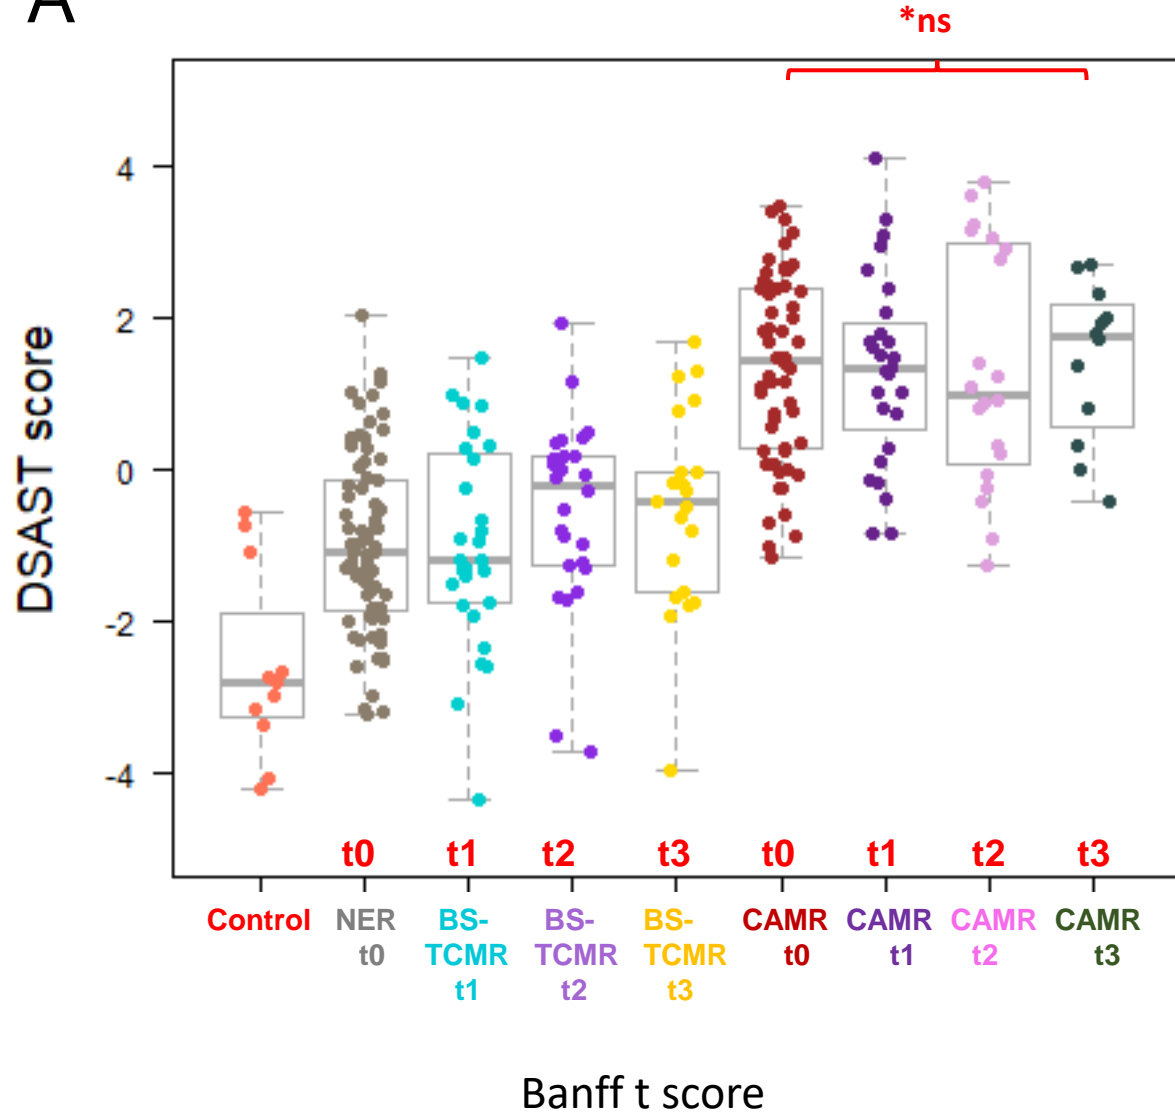

## B

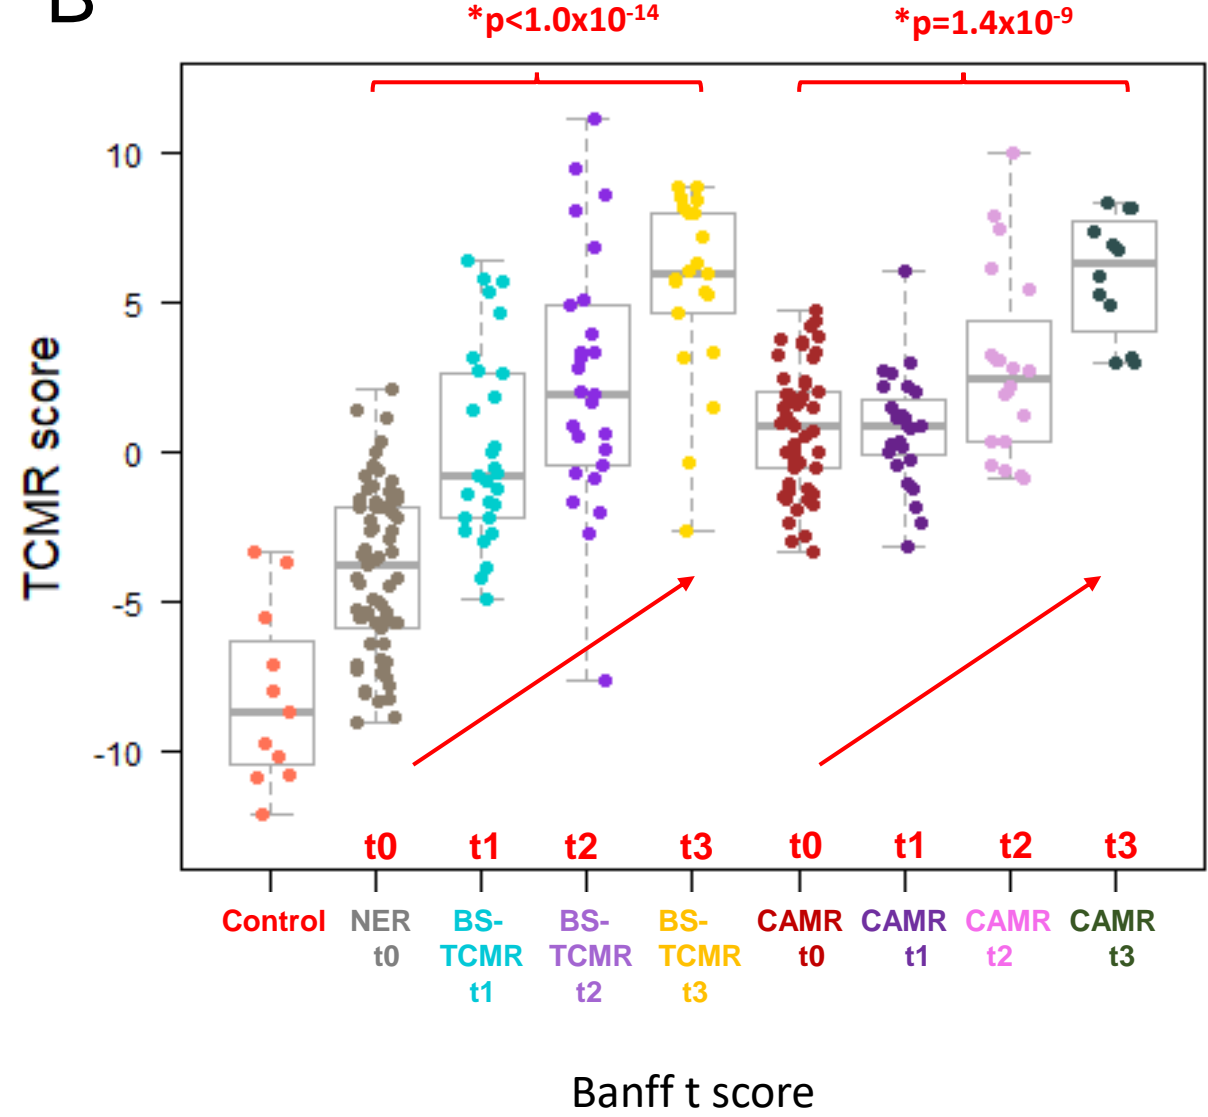

# Supplemental Figure 3

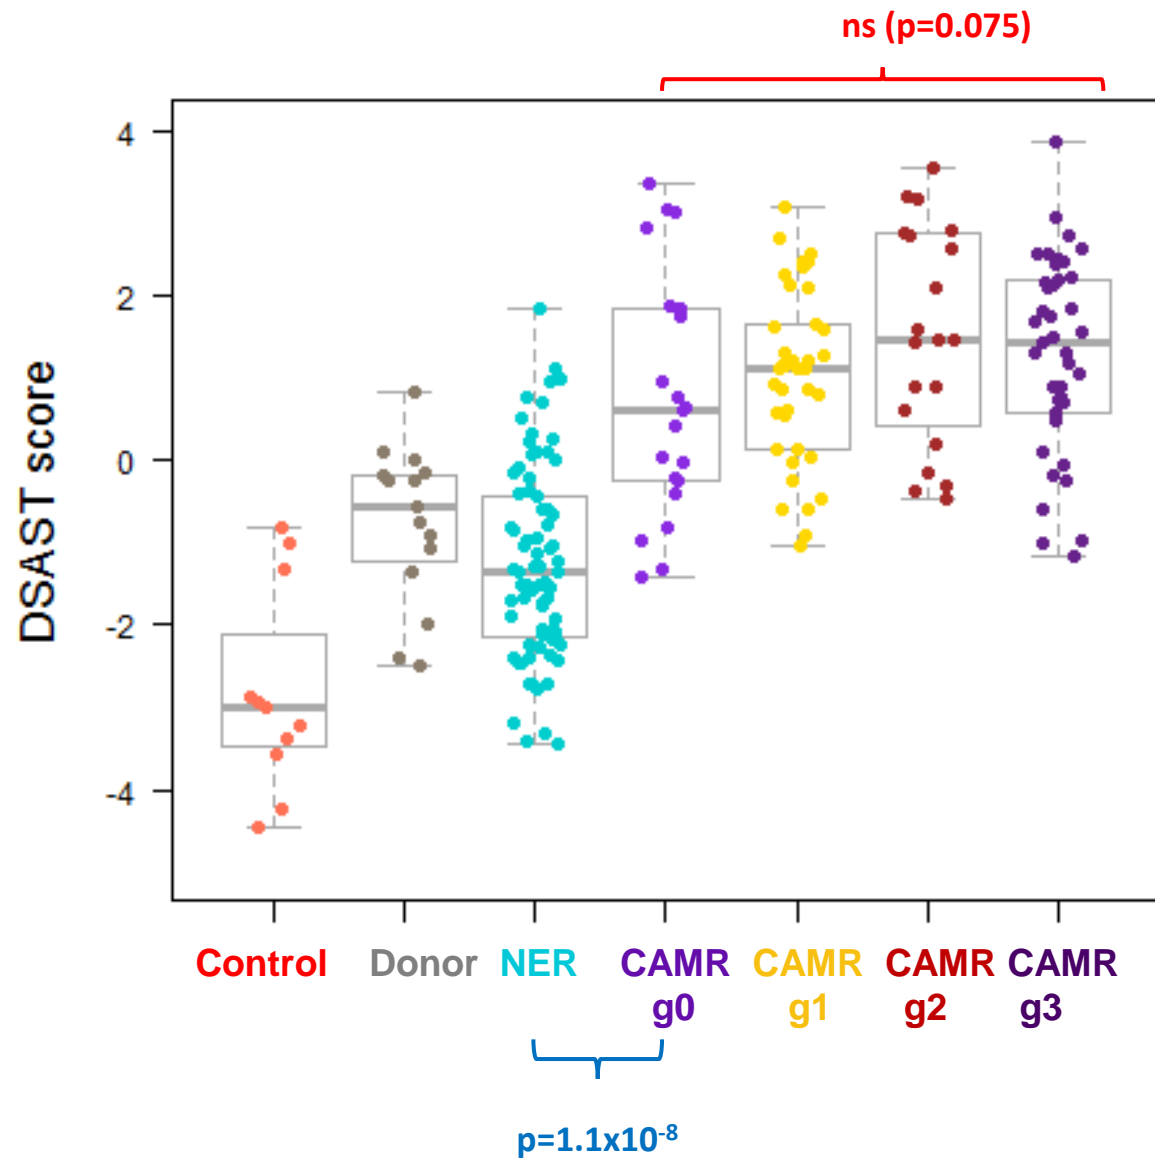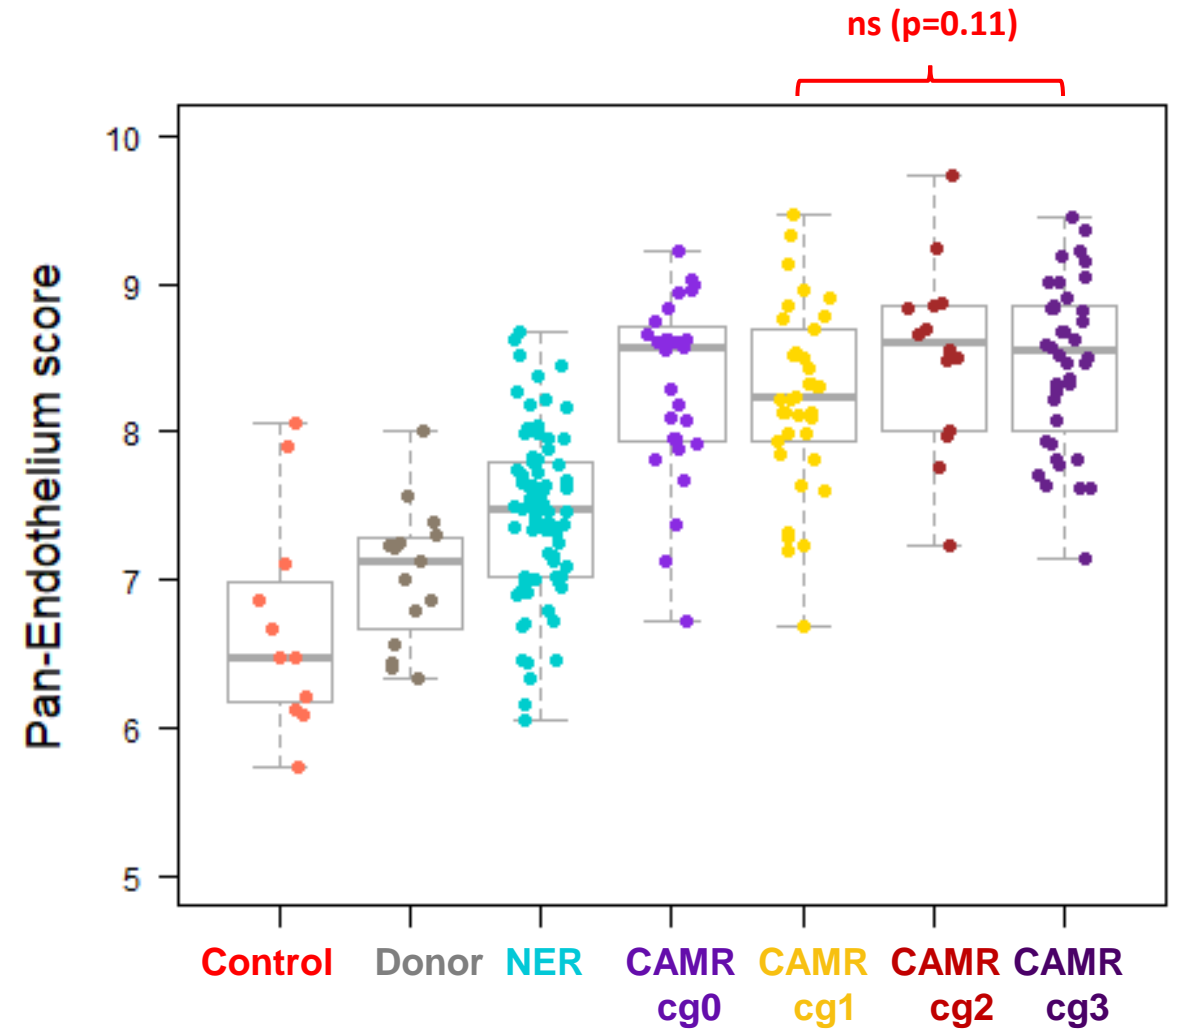

# Supplemental Figure 4

## A

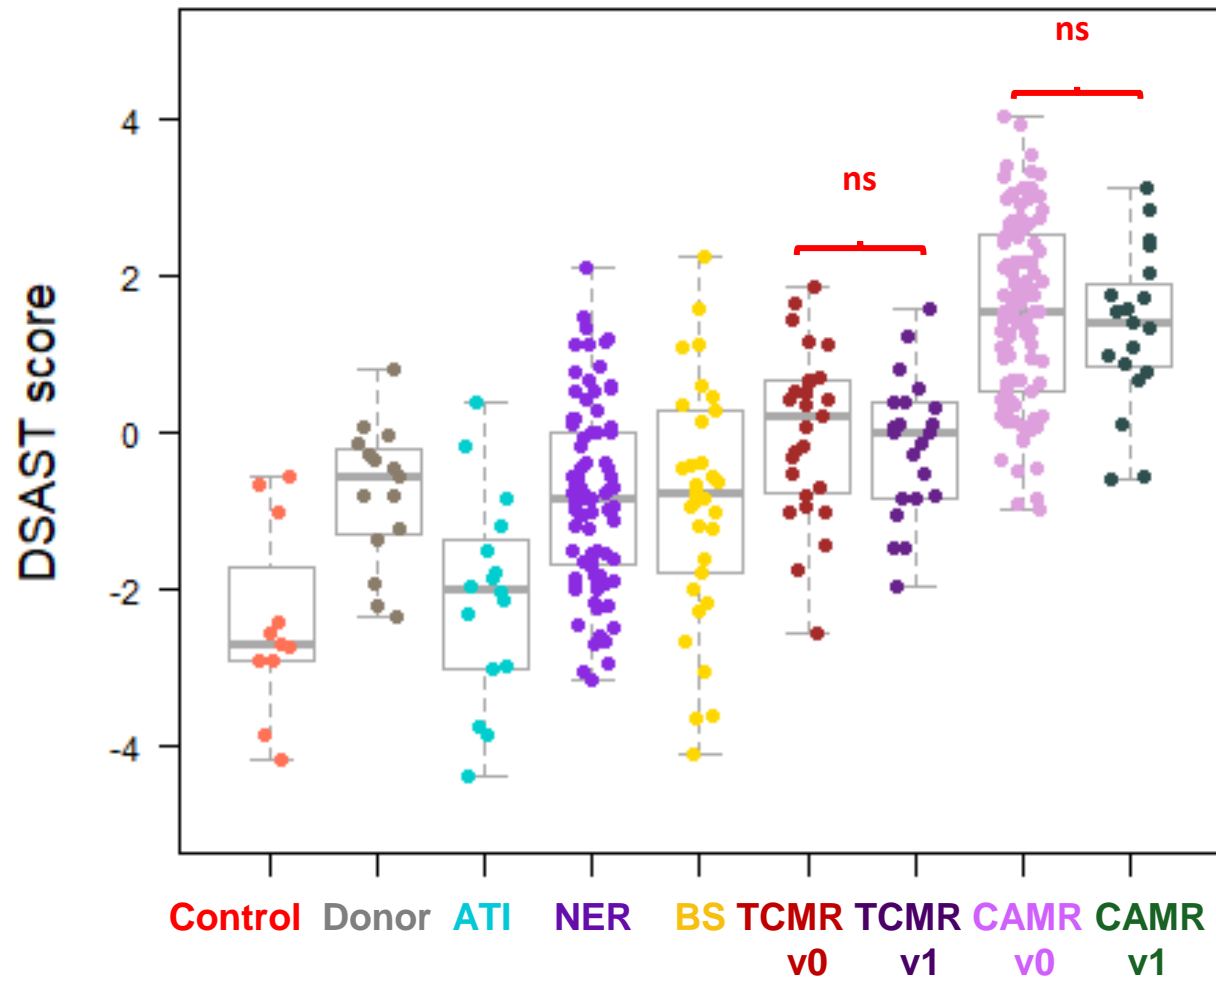

## B

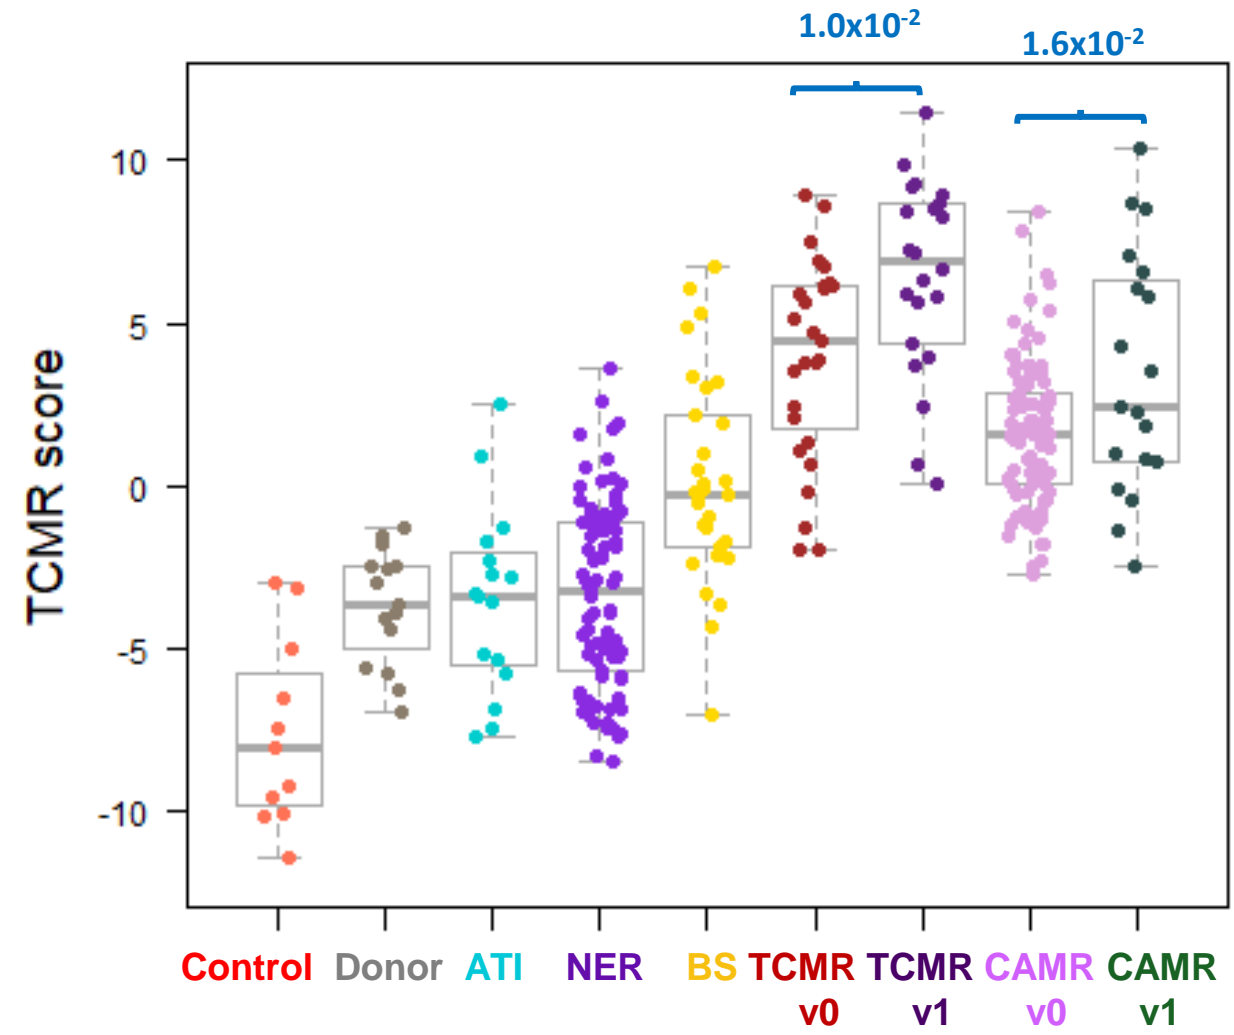



# Supplemental Figure 5

Higher in DSA Neg

| Gene       | Log2 fold change | std error (log2) | BY.p.value |
|------------|------------------|------------------|------------|
| <b>MET</b> | -0.647           | 0.135            | 0.00393    |

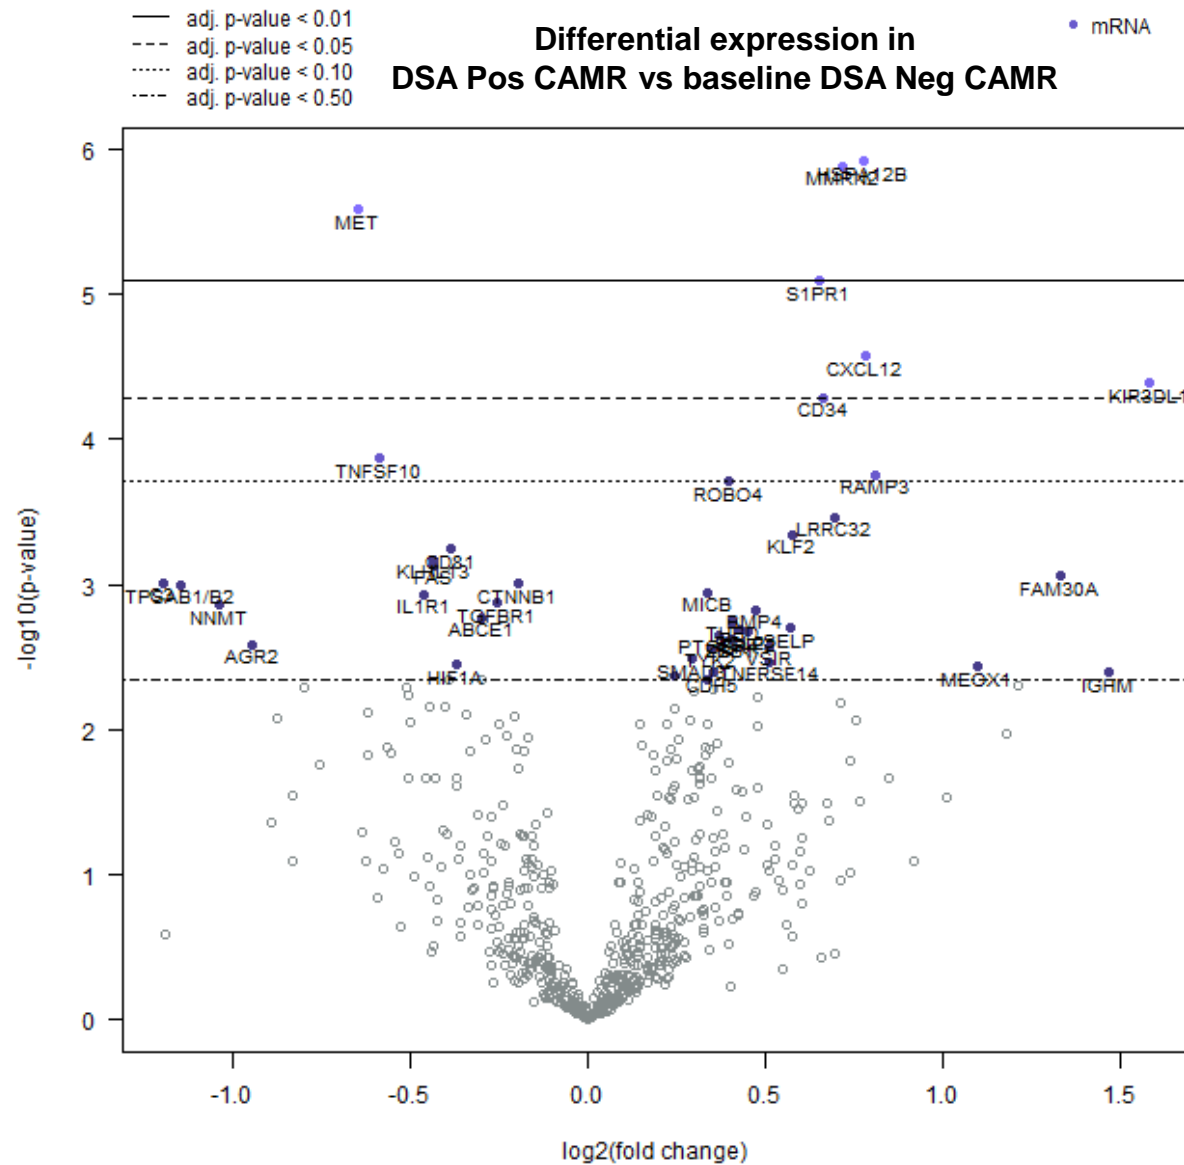

Higher in DSA Pos

| Gene           | Log2 fold change | std error (log2) | BY.p.value |
|----------------|------------------|------------------|------------|
| <b>KIR3DL1</b> | 1.58             | 0.377            | 0.0305     |
| <b>CXCL12</b>  | 0.781            | 0.183            | 0.024      |
| <b>HSPA12B</b> | 0.777            | 0.156            | 0.00292    |
| <b>MMRN2</b>   | 0.719            | 0.145            | 0.00292    |
| <b>CD34</b>    | 0.662            | 0.161            | 0.0333     |
| <b>S1PR1</b>   | 0.652            | 0.143            | 0.00912    |

## Endothelial Genes

*KIR3DL1* – NK cells

*CXCL12* - chemotactic LC, angiogenesis

# Supplemental Figure 6

A

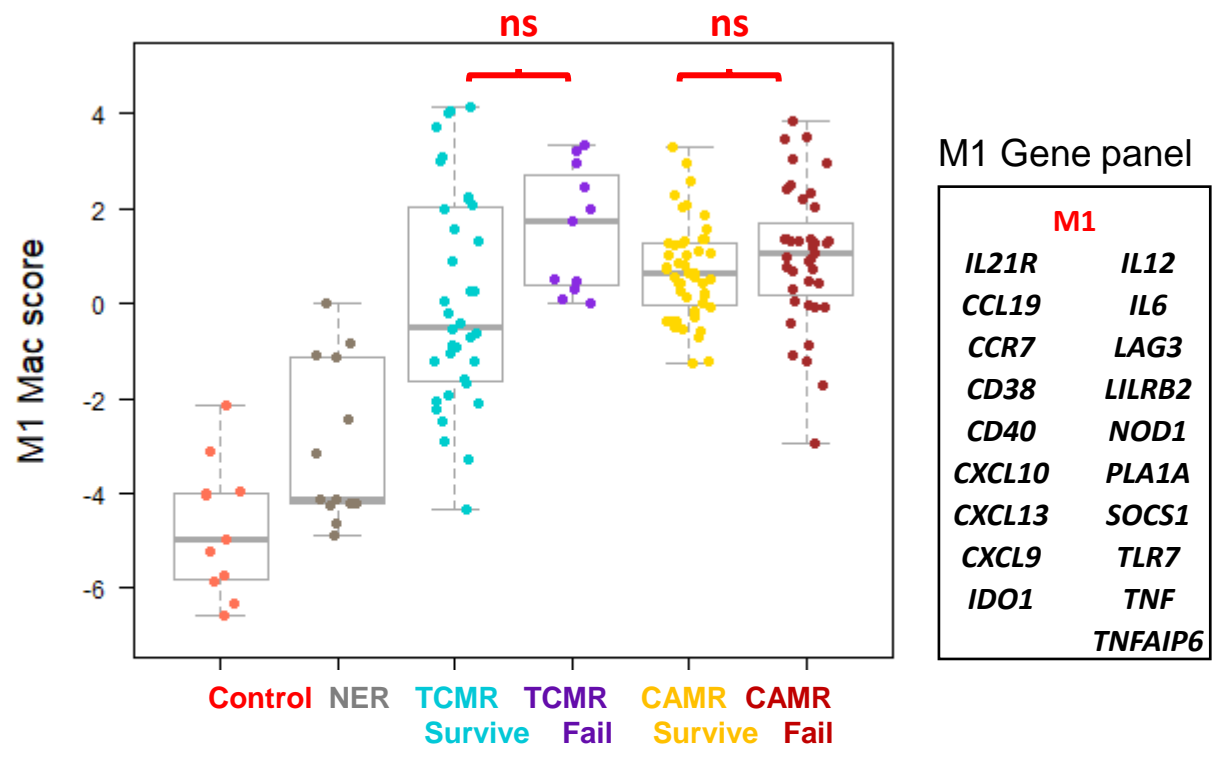

B

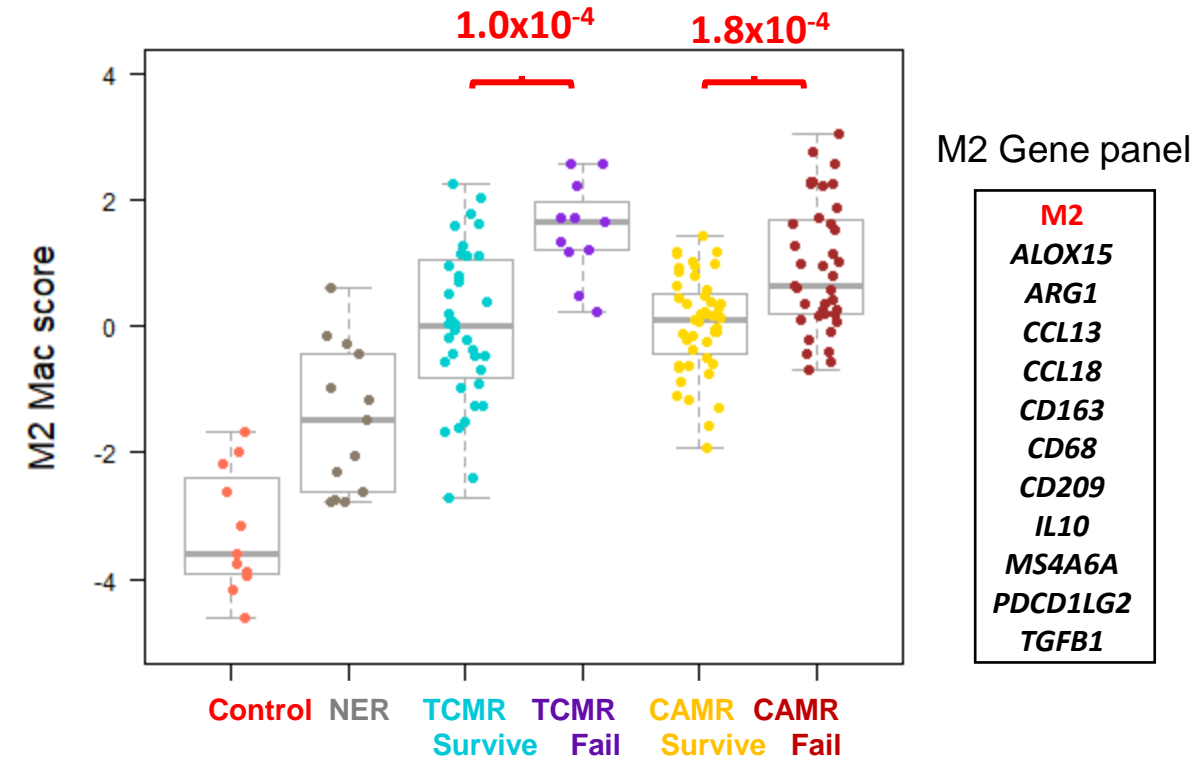

# Supplemental Figure 7

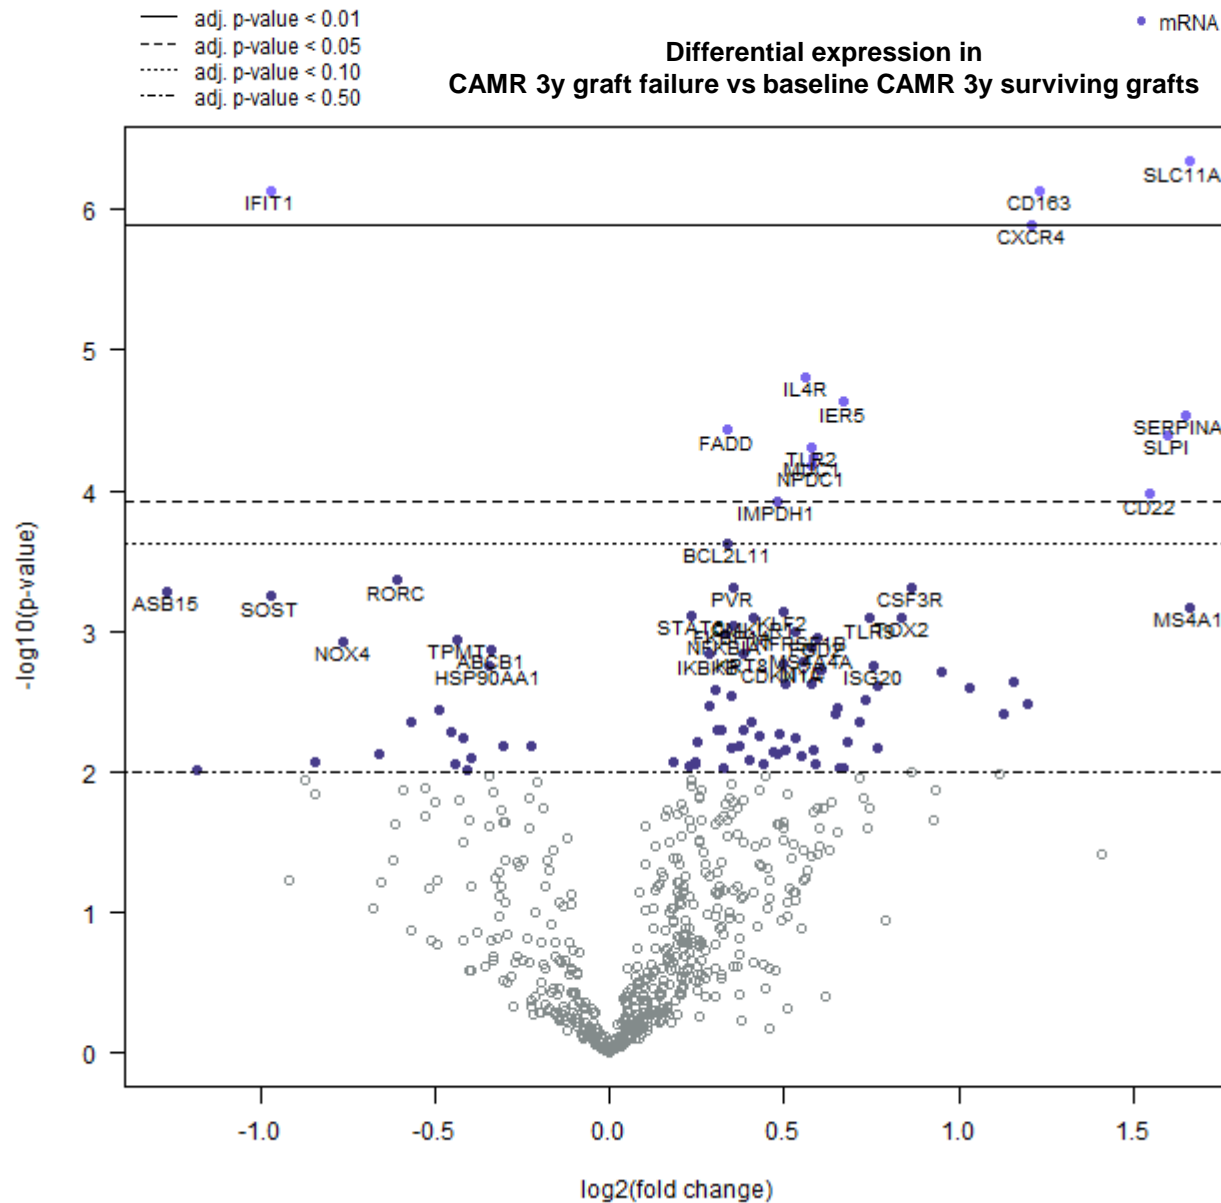

## CAMR 3 year graft failure

| Gene            | Log2 fold change | std error (log2) | BY.p.value |
|-----------------|------------------|------------------|------------|
| <b>SLC11A1</b>  | 1.66             | 0.315            | 0.00112    |
| <b>SERPINA3</b> | 1.65             | 0.382            | 0.0191     |
| <b>SLPI</b>     | 1.6              | 0.378            | 0.0207     |
| <b>CD22</b>     | 1.55             | 0.389            | 0.0375     |
| <b>CD163</b>    | 1.23             | 0.239            | 0.00112    |
| <b>CXCR4</b>    | 1.21             | 0.24             | 0.00145    |
| <b>IER5</b>     | 0.673            | 0.154            | 0.0178     |
| <b>MUC1</b>     | 0.584            | 0.141            | 0.0243     |
| <b>NPDC1</b>    | 0.58             | 0.141            | 0.0256     |
| <b>TLR2</b>     | 0.576            | 0.138            | 0.0224     |
| <b>IL4R</b>     | 0.559            | 0.125            | 0.0143     |
| <b>IMPDH1</b>   | 0.479            | 0.121            | 0.0389     |
| <b>FADD</b>     | 0.335            | 0.0788           | 0.0207     |

Macrophage

CAMR excluding CAMR+TCMR

# Supplemental Figure 8

## BS-TCMR Survival

| Gene           | Log2 fold change | std error (log2) | BY.p.value |
|----------------|------------------|------------------|------------|
| <b>MME</b>     | -1.55            | 0.321            | 3.27E-03   |
| <b>ERRFI1</b>  | -1.38            | 0.363            | 2.92E-02   |
| <b>SLC22A2</b> | -1.04            | 0.217            | 3.27E-03   |
| <b>ALDH3A2</b> | -0.867           | 0.199            | 7.84E-03   |
| <b>AQP1</b>    | -0.777           | 0.196            | 1.85E-02   |
| <b>DCAF12</b>  | 0.35             | 0.0784           | 5.95E-03   |
| <b>HLA-E</b>   | 0.454            | 0.116            | 2.14E-02   |
| <b>FAS</b>     | 0.56             | 0.139            | 1.68E-02   |
| <b>C5AR1</b>   | 0.581            | 0.154            | 3.17E-02   |
| <b>BST2</b>    | 0.594            | 0.146            | 1.68E-02   |
| <b>TLR4</b>    | 0.633            | 0.127            | 3.27E-03   |
| <b>AXL</b>     | 0.646            | 0.14             | 4.50E-03   |

**Tubular Epithelium**

## Differential expression in BS-TCMR graft failure vs baseline BS-TCMR surviving grafts

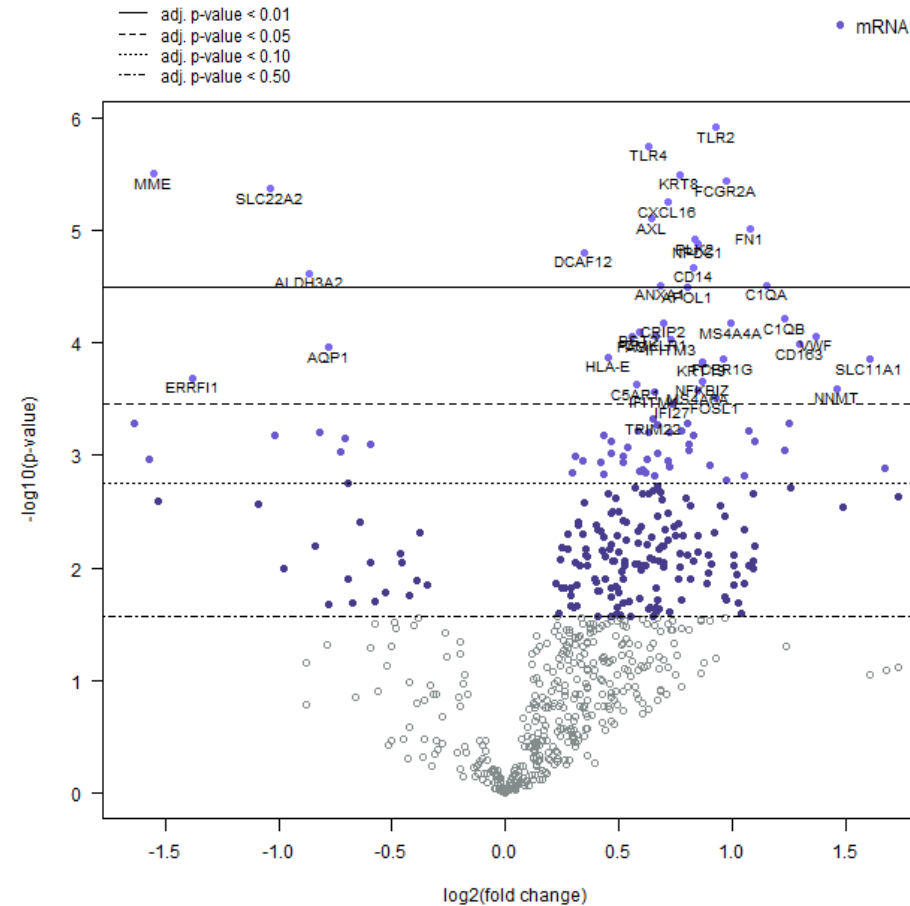

## BS-TCMR Fail

| Gene           | Log2 fold change | std error (log2) | BY.p.value |
|----------------|------------------|------------------|------------|
| <b>SLC11A1</b> | 1.61             | 0.411            | 2.14E-02   |
| <b>NNMT</b>    | 1.46             | 0.391            | 3.32E-02   |
| <b>VWF</b>     | 1.37             | 0.341            | 1.68E-02   |
| <b>CD163</b>   | 1.3              | 0.327            | 1.79E-02   |
| <b>C1QB</b>    | 1.23             | 0.299            | 1.53E-02   |
| <b>C1QA</b>    | 1.15             | 0.268            | 8.64E-03   |
| <b>FN1</b>     | 1.08             | 0.237            | 4.89E-03   |
| <b>MS4A4A</b>  | 0.996            | 0.243            | 1.53E-02   |
| <b>FCGR2A</b>  | 0.972            | 0.202            | 3.27E-03   |
| <b>FCER1G</b>  | 0.961            | 0.246            | 2.14E-02   |
| <b>TLR2</b>    | 0.93             | 0.184            | 3.27E-03   |

**Macrophage**

**Endothelium**

# Supplemental Figure 9

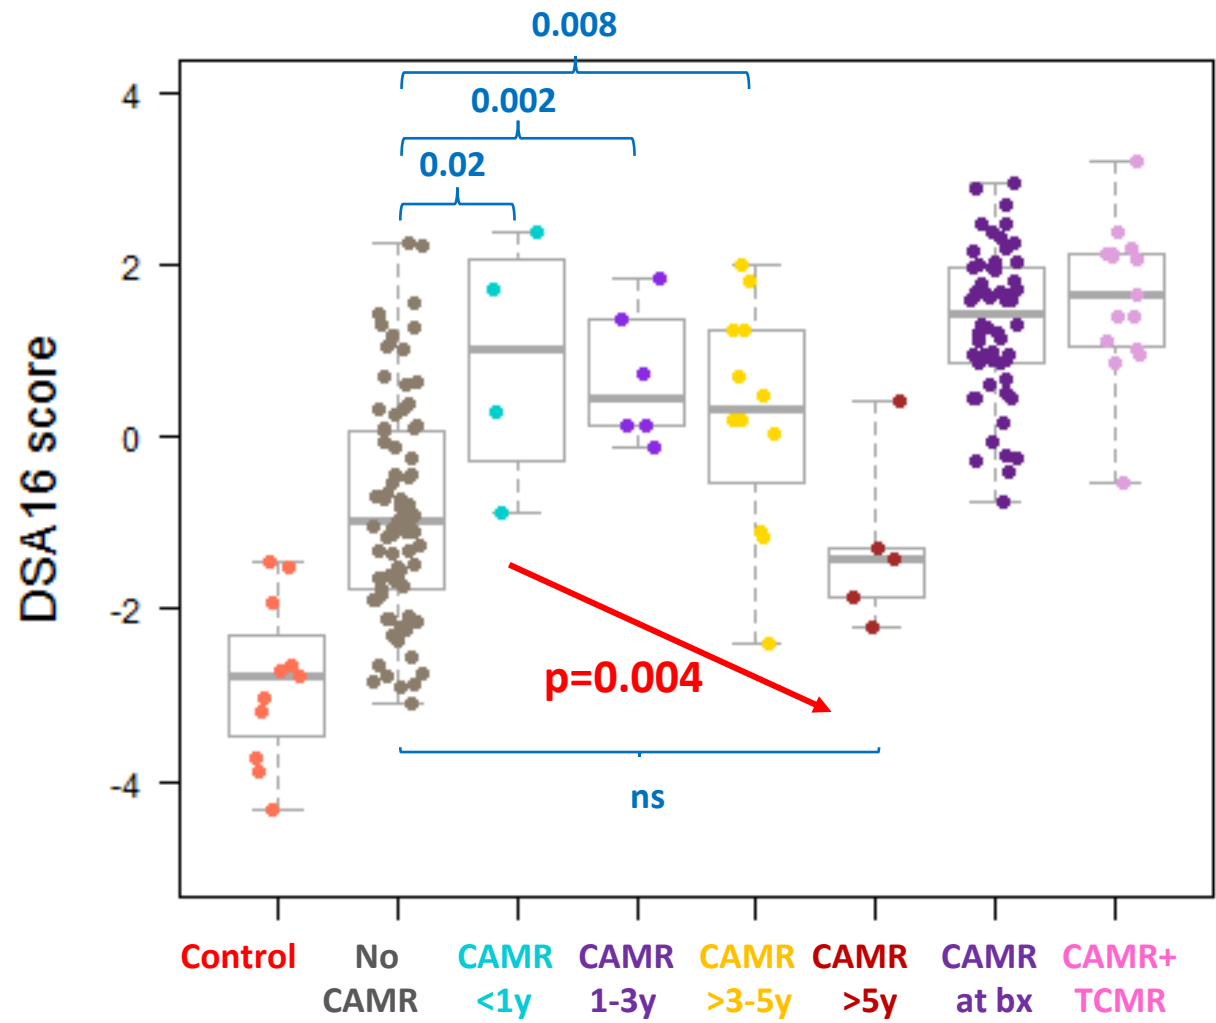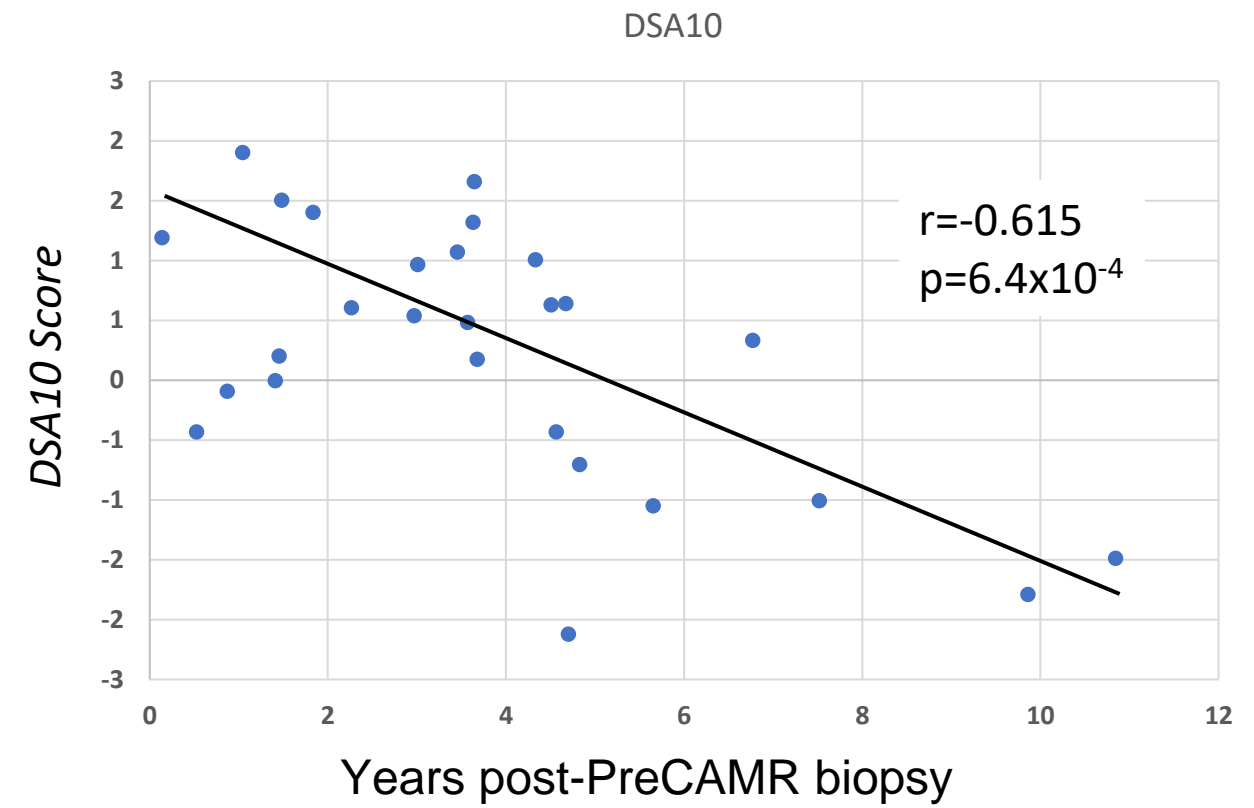

# Supplemental Figure 10

## Random Forest Outcome Classification

### CAMR/Mixed

Confusion matrix  
(OOB sample):

| RF Classification           | Outcome Observed |            | Total     | % Correct with RF Classification |
|-----------------------------|------------------|------------|-----------|----------------------------------|
|                             | Survive          | Fail       |           |                                  |
| Survive                     | 42               | 11         | 53        | 79%                              |
| Fail                        | 5                | 28         | 33        | 85%                              |
| <b>Total</b>                | <b>47</b>        | <b>39</b>  | <b>86</b> |                                  |
| <b>% Correct without RF</b> | <b>55%</b>       | <b>45%</b> |           |                                  |

Chi2 6.4x10<sup>-9</sup>

OOB error evolution

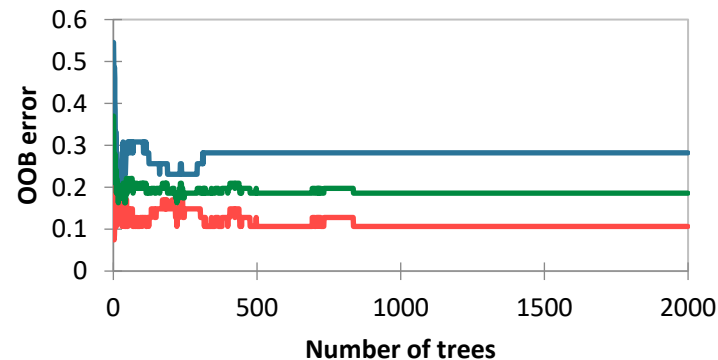

Forest type: Classification  
 Method: Bagging  
 Sampling method: Random with replacement  
 Sample sizes: 60  
 Required number of trees in the forest: 2000  
 Number of trees built: 2000  
 Seed (random numbers): 1757329514

## Top 30 Variables by Importance

| Variables              | Overall |
|------------------------|---------|
| <i>SLC11A1</i>         | 36.879  |
| Cr at biopsy           | 16.944  |
| % Globally Sclerotic   | 16.150  |
| <i>CD207</i>           | 13.359  |
| <i>CD163</i>           | 11.187  |
| Glomerular Endothelium | 11.115  |
| <i>TLR2</i>            | 10.249  |
| <i>IFIT1</i>           | 9.740   |
| <i>CD274</i>           | 9.533   |
| <i>NFKBIA</i>          | 9.323   |
| <i>FCER1A</i>          | 9.271   |
| <i>TNFRSF1B</i>        | 8.700   |
| <i>ANKRD22</i>         | 8.606   |
| Complement Inhibition  | 7.464   |
| <i>CDKN1A</i>          | 7.188   |
| % C4d                  | 7.135   |
| <i>MAPK13</i>          | 6.574   |
| <i>PDGFRB</i>          | 6.273   |
| <i>SERPINE1</i>        | 6.243   |
| <i>SLC4A1</i>          | 6.073   |
| % i-IFTA               | 5.847   |
| KT2                    | 5.369   |
| <i>MRC1</i>            | 5.268   |
| ah                     | 5.176   |
| <i>HLA-C</i>           | 4.365   |
| <i>IL4R</i>            | 3.354   |
| i                      | 3.238   |
| <i>ASB15</i>           | 2.617   |
| Years post transplant  | 2.597   |
| Macrophages            | 2.428   |

- Clinical/Lab
- Pathway/Cell
- Pathology
- Gene

\*All higher in Fail group except KT2, Glomerular endothelium, *FCER1A*, *ASB15*, *PDGFRB*, *IFIT1*, *CD207*, *SLC4A1*

# Supplemental Figure 11

## Random Forest Outcome Classification

### BS-TCMR

Confusion matrix  
(OOB sample):

| RF Classification           | Outcome Observed |            | Total     | % correct with RF Classification |
|-----------------------------|------------------|------------|-----------|----------------------------------|
|                             | Survive          | Fail       |           |                                  |
| Survive                     | 37               | 5          | 42        | 88%                              |
| Fail                        | 1                | 7          | 8         | 88%                              |
| <b>Total</b>                | <b>38</b>        | <b>12</b>  | <b>50</b> |                                  |
| <b>% Correct without RF</b> | <b>76%</b>       | <b>24%</b> |           |                                  |

Chi2      2.7x10<sup>-5</sup>

Forest type: Classification  
 Method: Bagging  
 Sampling method: Random with replacement  
 Sample sizes: 35  
 Required number of trees in the forest: 2000  
 Number of trees built: 2000  
 Seed (random numbers): 671507506

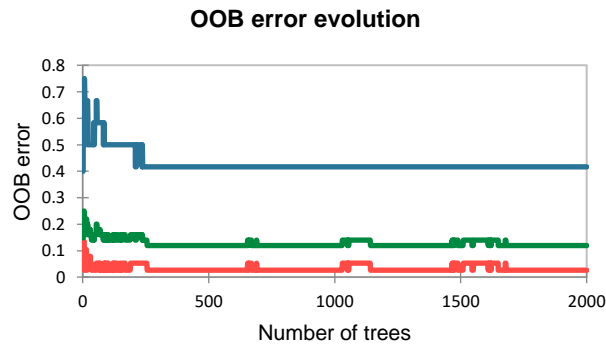

## Top 39 Variables by Importance

| Variables                         | Overall |
|-----------------------------------|---------|
| Cytosolic DNA Sensing             | 12.491  |
| Extracellular Matrix Organization | 11.032  |
| ALAS1                             | 10.312  |
| IFTA                              | 10.246  |
| TLR4                              | 9.294   |
| IFI6                              | 8.973   |
| Endothelium                       | 8.932   |
| CRIP2                             | 8.635   |
| CXCL16                            | 8.605   |
| CD14                              | 8.211   |
| Pan-BM                            | 8.193   |
| IRRAT                             | 7.922   |
| Years post transplantation        | 7.884   |
| g                                 | 7.342   |
| KRT8                              | 6.930   |
| M2 Macrophage                     | 6.809   |
| AKI                               | 6.553   |
| FAS                               | 6.441   |
| Fibrosis                          | 6.035   |
| Neutrophil degranulation          | 5.404   |
| mi (ptc+g)                        | 5.357   |
| C1QA                              | 5.345   |
| NOS3                              | 4.795   |
| MS4A7                             | 4.770   |
| i                                 | 4.721   |
| FCER1G                            | 4.473   |
| PLAUR                             | 4.307   |
| IRITD3                            | 4.269   |
| RHOJ                              | 4.230   |
| TLR5                              | 4.211   |
| DCAF12                            | 3.061   |
| COL3A1                            | 2.836   |
| ptc                               | 2.781   |
| Progression GoCAR                 | 2.609   |
| VWF                               | 2.437   |
| mTOR                              | 2.356   |
| MS4A6A                            | 1.833   |
| ITGAM                             | 1.639   |
| CCL21                             | 0.835   |

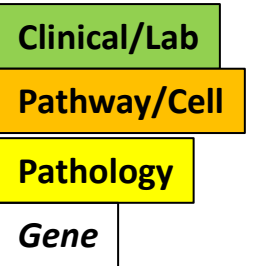

\*All variables higher in Fail group, except i

# Supplemental Figure 12A

## CAMR/Mixed Clinical and Lab Variables

Confusion matrix (OOB sample):

| from \ to       | G1 CAMR Survive | G2 CAMR Fail | Total | % correct |
|-----------------|-----------------|--------------|-------|-----------|
| G1 CAMR Survive | 37              | 7            | 44    | 84.1      |
| G2 CAMR Fail    | 10              | 28           | 38    | 73.7      |
| Total           | 47              | 35           | 82    | 79.3      |

Total Correct 79%

| Variables             | G1 CAMR Survive | G2 CAMR Fail | Overall |
|-----------------------|-----------------|--------------|---------|
| Cr at biopsy          | 62.480          | 70.302       | 80.164  |
| Years post transplant | 16.100          | 17.155       | 21.156  |
| Age (yrs)             | 17.352          | 5.888        | 14.690  |
| Gender                | -2.184          | 10.105       | 7.200   |
| # DSAs                | -2.673          | 7.488        | 3.741   |
| DSA                   | 4.265           | -0.492       | 2.282   |
| Max MFI               | -8.820          | 8.232        | 1.462   |
| DSA Class             | -2.293          | -1.891       | -2.838  |

Forest type: Classification  
Method: Bagging

Sampling method: Random with replacement  
Sample sizes: 70

Required number of trees in the forest: 2000  
Number of trees built: 2000

Seed (random numbers): 692640582

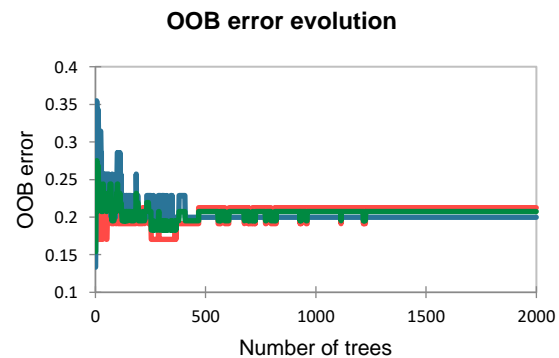

Omit 4 Cr>10



# Supplemental Figure 12B

## CAMR/Mixed Pathology Variables

Confusion matrix (OOB sample):

| from \ to       | G1 CAMR Survive I | G2 CAMR Fail I | Total | % correct |
|-----------------|-------------------|----------------|-------|-----------|
| G1 CAMR Survive | 36                | 14             | 50    | 72.0      |
| G2 CAMR Fail    | 11                | 25             | 36    | 69.4      |
| Total           | 47                | 39             | 86    | 70.9      |

Total Correct 71%

| Variables            | G1 CAMR Survive | G2 CAMR Fail | Overall |
|----------------------|-----------------|--------------|---------|
| %C4d                 | 31.386          | 20.355       | 33.667  |
| ah                   | 17.586          | 18.760       | 24.310  |
| i+t                  | 13.034          | 13.561       | 17.326  |
| i                    | 8.461           | 9.734        | 12.081  |
| C4d                  | 12.066          | 1.597        | 10.369  |
| % iIFTA              | 4.307           | 3.004        | 4.938   |
| ci                   | -1.055          | 5.626        | 2.894   |
| % fibrosis           | 2.351           | 1.782        | 2.856   |
| % Globally Sclerotic | 2.456           | 0.769        | 2.193   |
| cv                   | -2.647          | 5.301        | 1.831   |
| t                    | -1.718          | 3.313        | 1.282   |
| v                    | -3.270          | 2.887        | -0.044  |
| cg                   | -3.386          | 1.863        | -1.150  |
| ct                   | -1.743          | -0.036       | -1.267  |
| mi (ptc+g)           | -7.455          | 5.160        | -1.456  |
| g                    | -3.818          | 1.038        | -2.514  |
| % tubular atrophy    | -4.025          | -2.417       | -4.662  |
| ptc                  | -5.832          | -1.233       | -4.777  |

OOB error evolution

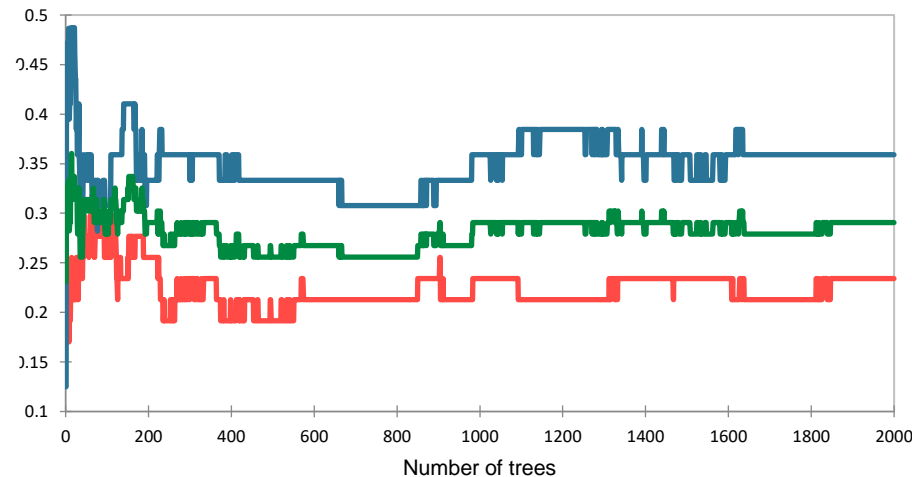

Forest type: Classification  
Method: Bagging

Sampling method: Random with replacement  
Sample sizes: 70  
Required number of trees in the forest: 2000  
Number of trees built: 2000

Seed (random numbers): 1110815619

# Supplemental Figure 12C

## CAMR/Mixed Pathway/Cell Type Scores

### Top 20

Confusion matrix (OOB sample):

| from \ to            | G1 CAMR<br>Survive I | G2 CAMR<br>Fail I | Total | % correct |
|----------------------|----------------------|-------------------|-------|-----------|
| G1 CAMR<br>Survive I | 30                   | 16                | 46    | 65.2      |
| G2 CAMR<br>Fail I    | 17                   | 23                | 40    | 57.5      |
| Total                | 47                   | 39                | 86    | 61.6      |

Total Correct 62%

Forest type: Classification  
Method: Bagging

Sampling method: Random with replacement  
Sample sizes: 70

Required number of trees in the forest: 2000  
Number of trees built: 2000

Seed (random numbers): 1362447273

OOB error evolution

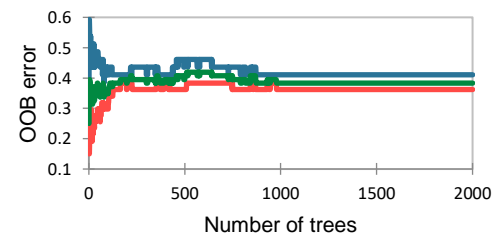

| Variables                   | G1 CAMR Survive I | G2 CAMR Fail I | Overall |
|-----------------------------|-------------------|----------------|---------|
| Complement Inhibition       | 17.871            | 16.179         | 21.304  |
| KT2                         | 9.924             | 9.046          | 12.058  |
| Macrophages.v<br>s.CD45     | 10.032            | 7.278          | 10.878  |
| GBM                         | 9.067             | 8.975          | 10.715  |
| CD4.vs.CD45                 | 7.846             | 7.330          | 9.322   |
| Glomerular<br>Endothelium   | 6.905             | 5.856          | 8.139   |
| eGFR later                  | 7.273             | 3.213          | 7.947   |
| M2 Mac                      | 7.714             | 3.842          | 7.728   |
| AMAT1                       | 5.305             | 5.309          | 7.558   |
| MS1                         | 3.466             | 6.983          | 7.368   |
| Tubule                      | 5.902             | 4.069          | 6.448   |
| AKI                         | 6.359             | 1.741          | 5.945   |
| Rho GTPase<br>signaling     | 3.227             | 4.872          | 5.486   |
| Neutrophil<br>degranulation | 4.479             | 3.736          | 5.481   |
| TGF-beta<br>Signaling       | 3.290             | 2.439          | 4.261   |
| KT1                         | 0.330             | 5.362          | 4.235   |
| Macrophages                 | 3.176             | 3.496          | 4.132   |
| M2 Mac10                    | 5.323             | -0.933         | 3.833   |
| AMR                         | -0.030            | 4.803          | 3.613   |
| IRRAT                       | 3.084             | 0.357          | 3.454   |

# Supplemental Figure 12D

## CAMR/Mixed Individual transcript counts

Confusion matrix (OOB sample):

| from \ to            | G1 CAMR<br>Survive I | G2 CAMR<br>Fail I | Total | % correct |
|----------------------|----------------------|-------------------|-------|-----------|
| G1 CAMR<br>Survive I | 39                   | 11                | 50    | 78.0      |
| G2 CAMR<br>Fail I    | 8                    | 28                | 36    | 77.8      |
| Total                | 47                   | 39                | 86    | 77.9      |

**Total Correct 78%**

Forest type: Classification  
Method: Bagging

Sampling method: Random with replacement  
Sample sizes: 70

Required number of trees in the forest: 2000  
Number of trees built: 2000

Seed (random numbers): 22568641

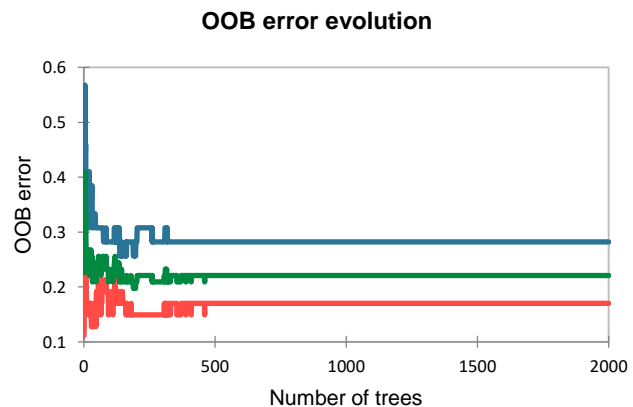

## Top 25

| Variables | G1 CAMR Survive I | G2 CAMR Fail I | Overall |
|-----------|-------------------|----------------|---------|
| SLC11A1   | 33.067            | 32.116         | 36.304  |
| TLR2      | 9.610             | 10.232         | 11.251  |
| CD274     | -0.705            | 8.357          | 7.888   |
| FCER1A    | 2.633             | 7.506          | 7.815   |
| TNFRSF1B  | 7.231             | 5.093          | 7.308   |
| CD163     | 6.628             | 5.328          | 7.082   |
| NFKBIA    | 6.355             | 4.907          | 7.021   |
| IFIT1     | 6.017             | 5.214          | 6.646   |
| ANKRD22   | 3.034             | 6.481          | 6.369   |
| SERPINE1  | 4.906             | 4.660          | 5.572   |
| S100A9    | 4.038             | 4.490          | 5.168   |
| SLC4A1    | 3.422             | 4.156          | 4.821   |
| CD207     | 4.201             | 4.011          | 4.653   |
| MALL      | 4.086             | 2.775          | 4.611   |
| MRC1      | 3.506             | 3.015          | 3.950   |
| MS4A4A    | 1.680             | 4.189          | 3.804   |
| BRWD1     | 5.198             | -1.134         | 3.749   |
| CMKLR1    | 2.203             | 3.403          | 3.526   |
| MAPK13    | 2.961             | 2.419          | 3.365   |
| GBP5      | -0.401            | 3.417          | 3.299   |
| GIMAP5    | 1.655             | 2.393          | 3.245   |
| TGIF1     | 3.214             | 2.391          | 3.208   |
| CDH13     | 0.209             | 3.443          | 3.075   |
| HYAL2     | 2.811             | 1.735          | 2.960   |
| SLC12A3   | 3.036             | 1.070          | 2.887   |

# Supplemental Figure 13A

## BS-TCMR Clin/Lab

Confusion matrix (OOB sample):

| from \ to          | F1 TCMR-BS Survive | F2 TCMR-BS Fail | Total | % correct |
|--------------------|--------------------|-----------------|-------|-----------|
| F1 TCMR-BS Survive | 31                 | 12              | 43    | 72.1      |
| F2 TCMR-BS Fail    | 7                  | 0               | 7     | 0.0       |
| Total              | 38                 | 12              | 50    | 62.0      |

Total Correct 62%

| Variables                     | F1 TCMR-BS Survive | F2 TCMR-BS Fail | Overall |
|-------------------------------|--------------------|-----------------|---------|
| DSA Present at biopsy 1-26-22 | 15.793             | -3.273          | 12.383  |
| # DSAs                        | 2.131              | -1.918          | 0.693   |
| Years post tx (Calc)          | 3.479              | -8.562          | -2.162  |
| Gender                        | -3.506             | 0.859           | -2.482  |
| Cr at time of bx              | -4.201             | -0.179          | -2.953  |

Forest type: Classification

Method: Bagging

Sampling method: Random with replacement

Sample sizes: 35

Required number of trees in the forest: 2000

Number of trees built: 2000

Seed (random numbers): 1975305146

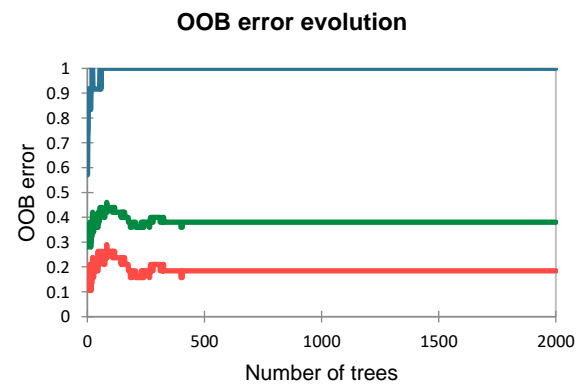

# Supplemental Figure 13B

Confusion matrix (OOB sample):

| from \ to          | F1 TCMR-BS Survive | F2 TCMR-BS Fail | Total | % correct |
|--------------------|--------------------|-----------------|-------|-----------|
| F1 TCMR-BS Survive | 33                 | 10              | 43    | 76.7      |
| F2 TCMR-BS Fail    | 5                  | 2               | 7     | 28.6      |
| Total              | 38                 | 12              | 50    | 70.0      |

## BS-TCMR Pathology

| Variables         | F1 TCMR-BS Survive | F2 TCMR-BS Fail | Overall |
|-------------------|--------------------|-----------------|---------|
| ptc               | 13.726             | 11.985          | 15.959  |
| mi (ptc+g)        | 13.430             | 12.893          | 15.145  |
| % fibrosis        | 11.399             | 9.040           | 12.930  |
| g                 | 11.801             | 5.629           | 10.765  |
| C4d               | 9.980              | 4.232           | 8.763   |
| % tubular atrophy | 8.682              | -3.054          | 5.962   |
| i                 | 11.635             | -7.480          | 5.174   |
| ct                | 4.102              | -2.642          | 3.181   |
| v                 | 4.194              | -2.874          | 2.525   |
| t                 | 4.979              | -6.633          | 0.664   |

Total Correct 70%

Forest type: Classification  
Method: Bagging

Sampling method: Random with replacement  
Sample sizes: 35

Required number of trees in the forest: 2000  
Number of trees built: 2000

Seed (random numbers): 678733136

OOB error evolution

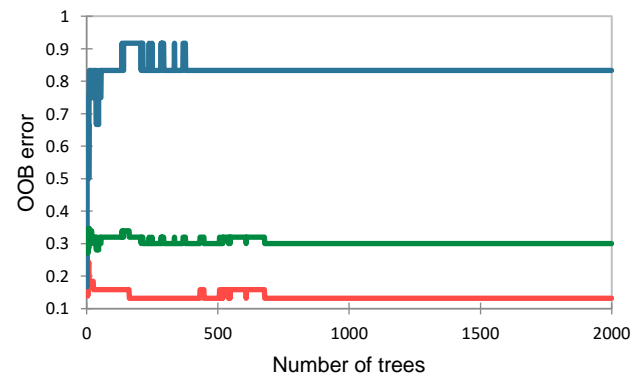

# Supplemental Figure 13C

Confusion matrix (OOB sample):

| from \ to          | F1 TCMR-BS Survive | F2 TCMR-BS Fail | Total | % correct |
|--------------------|--------------------|-----------------|-------|-----------|
| F1 TCMR-BS Survive | 34                 | 5               | 39    | 87.2      |
| F2 TCMR-BS Fail    | 4                  | 7               | 11    | 63.6      |
| Total              | 38                 | 12              | 50    | 82.0      |

## BS-TCMR Pathways/Cell Types

| Variables                         | F1 TCMR-BS Survive | F2 TCMR-BS Fail | Overall |
|-----------------------------------|--------------------|-----------------|---------|
| Extracellular Matrix Organization | 17.438             | 9.663           | 16.878  |
| Pan-BM                            | 15.828             | 7.391           | 15.633  |
| IRRAT                             | 15.482             | 2.602           | 14.722  |
| IFTA                              | 7.710              | 6.094           | 8.830   |
| Neutrophil degranulation          | 8.865              | 5.423           | 8.812   |
| Endothelium                       | 8.174              | 6.327           | 8.343   |
| Macrophages                       | 7.558              | 5.609           | 7.965   |
| Cytosolic DNA Sensing             | 7.933              | 0.965           | 7.864   |
| M2 Mac                            | 6.785              | 4.650           | 7.081   |
| IRITD5                            | 5.690              | 4.292           | 6.033   |
| Fibrosis                          | 5.961              | 3.899           | 6.012   |
| Complement Components             | 3.944              | 4.607           | 5.262   |
| IRITD3                            | 5.365              | 3.982           | 5.034   |
| Complement Inhibition             | 3.676              | 3.558           | 4.853   |
| AKI                               | 6.453              | 1.416           | 4.679   |
| KT1                               | 2.625              | 4.132           | 4.187   |
| NK                                | 4.117              | 1.214           | 4.169   |
| CAMR NHP                          | 4.809              | 2.553           | 4.075   |
| Progression GoCAR                 | 3.953              | 1.820           | 3.583   |
| ABMR-RATs                         | 6.802              | -2.633          | 3.347   |
| M2 Mac11                          | 2.933              | 1.967           | 3.057   |
| Exhausted CD8                     | 2.576              | 0.633           | 2.693   |
| QCMAT                             | 2.593              | 1.224           | 2.556   |
| ENDAT                             | 2.481              | 0.900           | 2.514   |
| IL6 Signaling                     | 2.310              | 0.426           | 2.482   |

Total Correct 82%

Forest type: Classification

Method: Bagging

Sampling method: Random with replacement

Sample sizes: 35

Required number of trees in the forest: 2000

Number of trees built: 2000

Seed (random numbers): 651298721

OOB error evolution

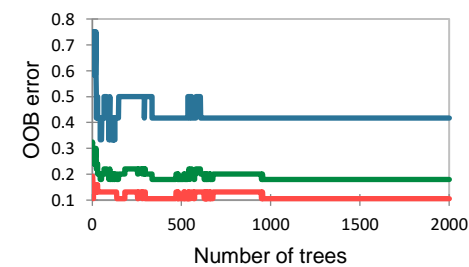

# Supplemental Figure 13D

## BS-TCMR Individual Transcripts

Confusion matrix (OOB sample):

| from \ to          | F1 TCMR-BS Survive | F2 TCMR-BS Fail | Total | % correct |
|--------------------|--------------------|-----------------|-------|-----------|
| F1 TCMR-BS Survive | 33                 | 9               | 42    | 78.6      |
| F2 TCMR-BS Fail    | 5                  | 3               | 8     | 37.5      |
| Total              | 38                 | 12              | 50    | 72.0      |

Total Correct 72%

Forest type: Classification

Method: Bagging

Sampling method: Random with replacement

Sample sizes: 35

Required number of trees in the forest: 2000

Number of trees built: 2000

Seed (random numbers): 1908038177

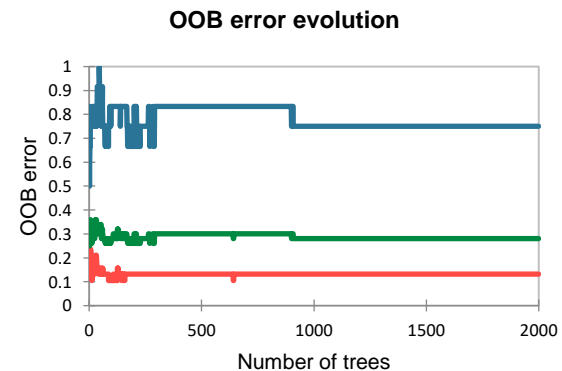

| Variables | F1 TCMR-BS Survive | F2 TCMR-BS Fail | Overall |
|-----------|--------------------|-----------------|---------|
| FCGR2A    | 9.846              | 10.431          | 10.845  |
| IFI6      | 8.048              | 7.693           | 8.259   |
| KRT8      | 7.152              | 6.795           | 7.431   |
| COL4A1    | 5.453              | 7.716           | 7.148   |
| TLR4      | 5.963              | 5.227           | 6.251   |
| FN1       | 4.919              | 6.165           | 5.992   |
| CXCL16    | 4.644              | 5.303           | 5.358   |
| CD14      | 4.288              | 4.896           | 5.024   |
| CRIP2     | 4.401              | 4.181           | 4.415   |
| ALAS1     | 3.857              | 4.356           | 4.253   |
| ITGAX     | 4.025              | 2.548           | 4.099   |
| FAS       | 3.725              | 3.889           | 4.091   |
| MS4A7     | 3.199              | 4.178           | 3.932   |
| COL1A1    | 3.042              | 3.654           | 3.831   |
| C1QA      | 3.300              | 3.729           | 3.780   |
| CD163     | 2.471              | 3.865           | 3.574   |
| ITGB6     | 2.646              | 3.165           | 3.410   |
| VWF       | 3.255              | 3.183           | 3.385   |
| FCER1G    | 2.890              | 3.241           | 3.327   |
| DCAF12    | 3.322              | 2.849           | 3.312   |
| LCN2      | 3.278              | 3.129           | 3.288   |
| TNF       | 3.022              | 1.029           | 3.243   |
| RHOJ      | 2.865              | 2.872           | 3.028   |
| ISG15     | 2.549              | 2.521           | 2.831   |
| MS4A4A    | 2.051              | 2.790           | 2.736   |
| AXL       | 2.460              | 2.447           | 2.620   |
| PDCD1LG2  | 2.694              | 1.665           | 2.561   |
| COL3A1    | 2.116              | 2.970           | 2.558   |
| PLAUR     | 2.358              | 2.394           | 2.548   |
| NOS3      | 2.371              | 2.351           | 2.514   |
